# Supplementary material for: Reconfigurable self-assembly of photocatalytic magnetic microrobots for water purification
Source: Springer Nature journal article supplement (doi:10.1038/s41467-023-42674-9), 2023-11-01
Supplement: MOESM1 [file 41467_2023_42674_MOESM1_ESM.pdf]

# Reconfigurable self-assembly of photocatalytic magnetic microrobots for water purification

Mario Urso<sup>1</sup>, Martina Ussia<sup>1</sup>, Xia Peng<sup>1</sup>, Cagatay M. Oral<sup>1</sup>, Martin Pumera<sup>1,2,3,4\*</sup>

<sup>1</sup> Future Energy and Innovation Laboratory, Central European Institute of Technology, Brno University of Technology, Purkyňova 123, 61200 Brno, Czech Republic

<sup>2</sup> Faculty of Electrical Engineering and Computer Science, VSB - Technical University of Ostrava, 17. listopadu 2172/15, 70800 Ostrava, Czech Republic

<sup>3</sup> Department of Medical Research, China Medical University Hospital, China Medical University, Hsueh-Shih Road 91, 40402 Taichung, Taiwan

<sup>4</sup> Department of Chemical and Biomolecular Engineering, Yonsei University, Yonsei-ro 50, Seodaemun-gu, 03722 Seoul, Republic of Korea

E-mail: [pumera.research@gmail.com](mailto:pumera.research@gmail.com)

Supplementary Information

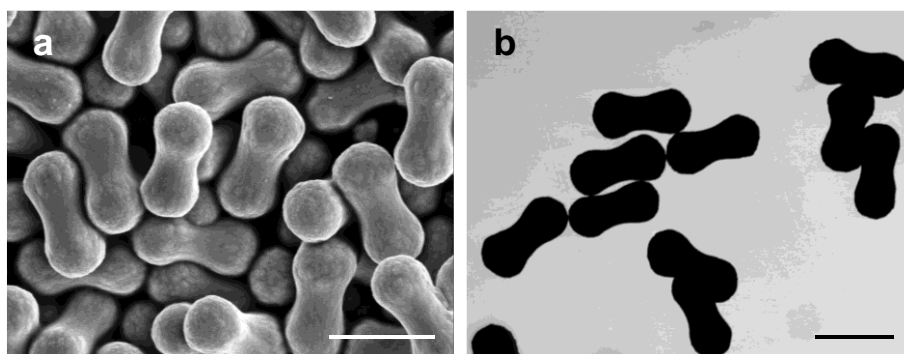

**Supplementary Fig. 1: Characterization of  $\text{TiO}_2/\alpha\text{-Fe}_2\text{O}_3$  microrobots by SEM and STEM analyses.** **a** SEM and **b** STEM images of  $\text{TiO}_2/\alpha\text{-Fe}_2\text{O}_3$  microrobots. Scale bars are 2  $\mu\text{m}$ .

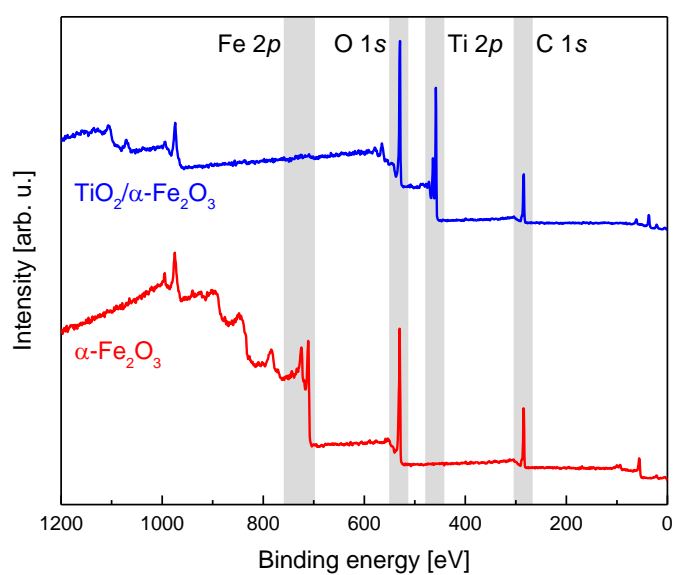

**Supplementary Fig. 2: Characterization of samples by XPS analysis.** XPS wide spectra of  $\alpha\text{-Fe}_2\text{O}_3$  microparticles and  $\text{TiO}_2/\alpha\text{-Fe}_2\text{O}_3$  microrobots.

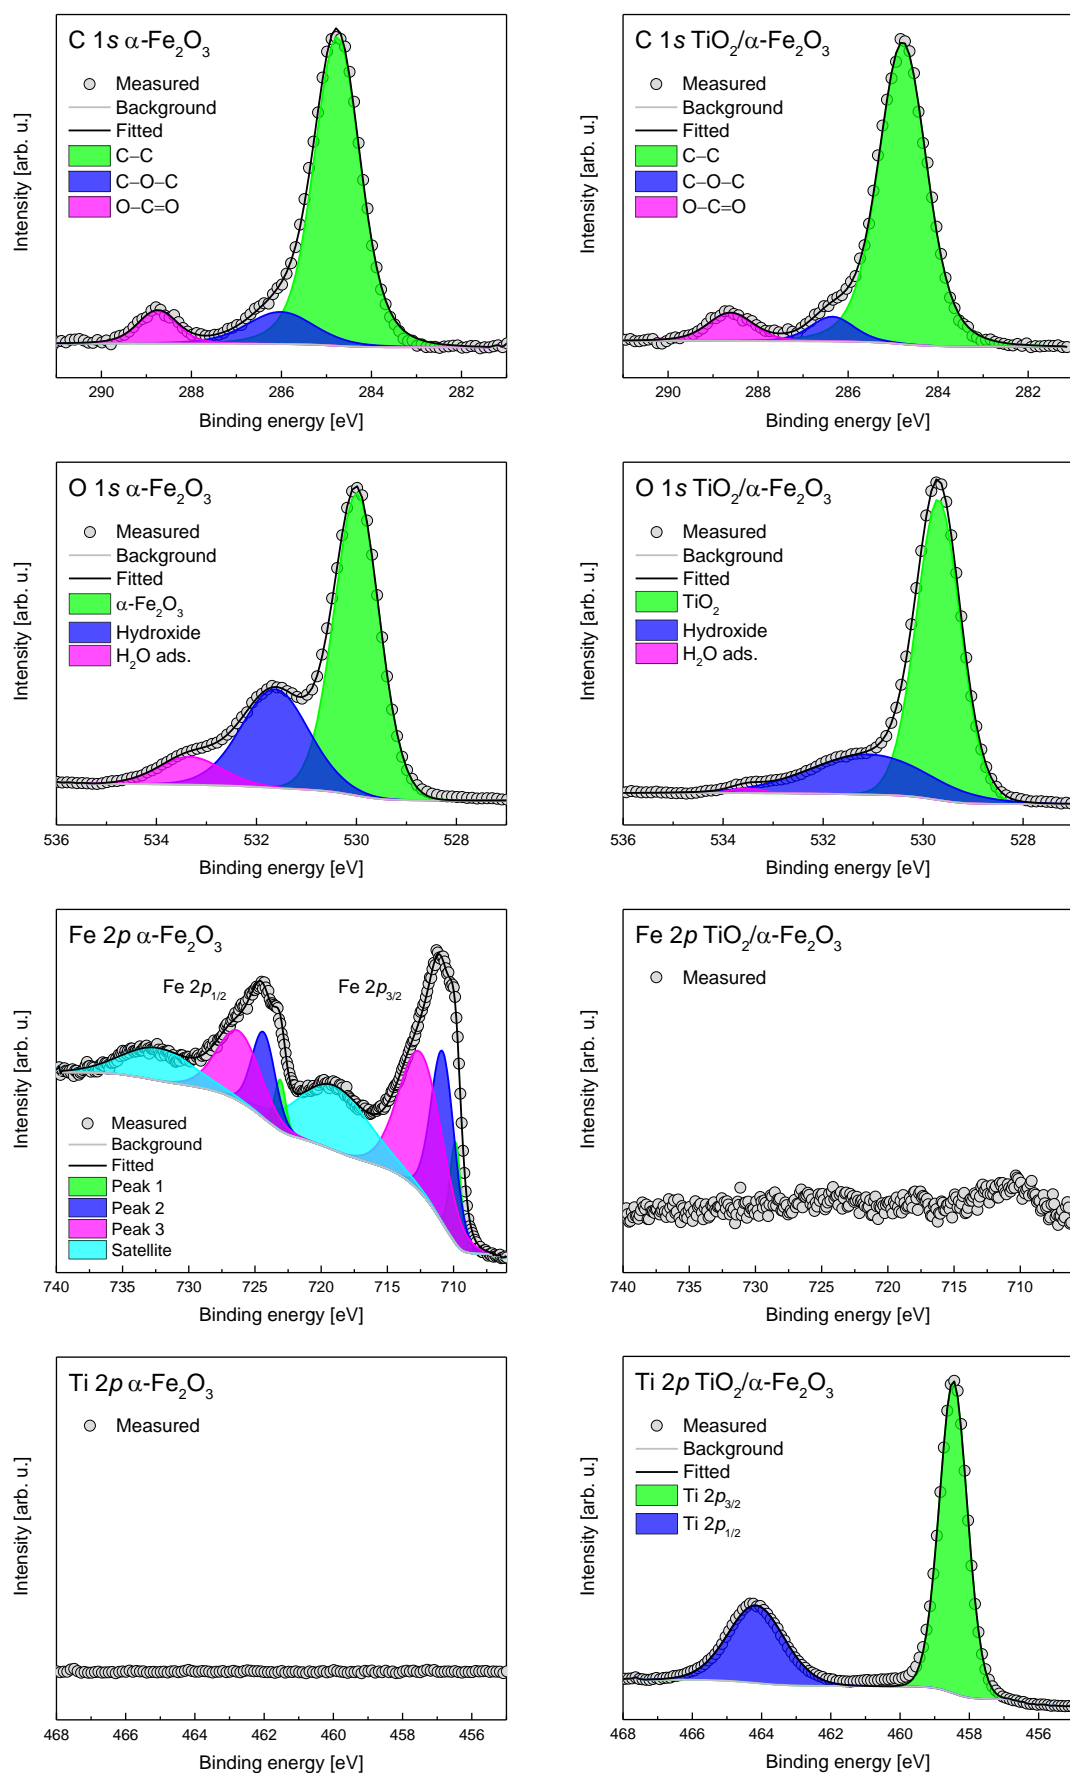

**Supplementary Fig. 3: Characterization of samples by high-resolution XPS analysis.** High-resolution XPS spectra of C 1s, O 1s, Fe 2p, and Ti 2p for  $\alpha\text{-Fe}_2\text{O}_3$  microparticles and  $\text{TiO}_2/\alpha\text{-Fe}_2\text{O}_3$  microrobots.

**Supplementary Table 1.** XPS peak fitting results for  $\alpha$ -Fe<sub>2</sub>O<sub>3</sub> microparticles and TiO<sub>2</sub>/ $\alpha$ -Fe<sub>2</sub>O<sub>3</sub> microrobots.

| Sample                                                      | Region                                          | Binding energy [eV] | Assigned to                              | Ref. |
|-------------------------------------------------------------|-------------------------------------------------|---------------------|------------------------------------------|------|
| $\alpha$ -Fe <sub>2</sub> O <sub>3</sub>                    | C 1s                                            | 284.8               | C–C                                      | 1    |
|                                                             |                                                 | 286.0               | C–O–C                                    |      |
|                                                             |                                                 | 288.8               | O–C=O                                    |      |
|                                                             | O 1s                                            | 530.0               | $\alpha$ -Fe <sub>2</sub> O <sub>3</sub> | 2    |
|                                                             |                                                 | 531.6               | Hydroxide                                |      |
|                                                             |                                                 | 533.3               | H <sub>2</sub> O ads.                    |      |
|                                                             | Fe 2p <sub>3/2</sub><br>(Fe 2p <sub>1/2</sub> ) | 709.8 (723.1)       | Peak 1                                   | 2    |
|                                                             |                                                 | 710.8 (724.4)       | Peak 2                                   |      |
|                                                             |                                                 | 712.5 (726.2)       | Peak 3                                   |      |
|                                                             |                                                 | 719.1 (732.3)       | Satellite                                |      |
| TiO <sub>2</sub> / $\alpha$ -Fe <sub>2</sub> O <sub>3</sub> | C 1s                                            | 284.8               | C–C                                      | 1    |
|                                                             |                                                 | 286.4               | C–O–C                                    |      |
|                                                             |                                                 | 288.6               | O–C=O                                    |      |
|                                                             | O 1s                                            | 529.7               | TiO <sub>2</sub>                         | 3    |
|                                                             |                                                 | 531.1               | Hydroxide                                |      |
|                                                             |                                                 | 533.5               | H <sub>2</sub> O ads.                    |      |
|                                                             | Ti 2p                                           | 458.5               | Ti 2p <sub>3/2</sub>                     | 3    |
|                                                             |                                                 | 464.2               | Ti 2p <sub>1/2</sub>                     |      |

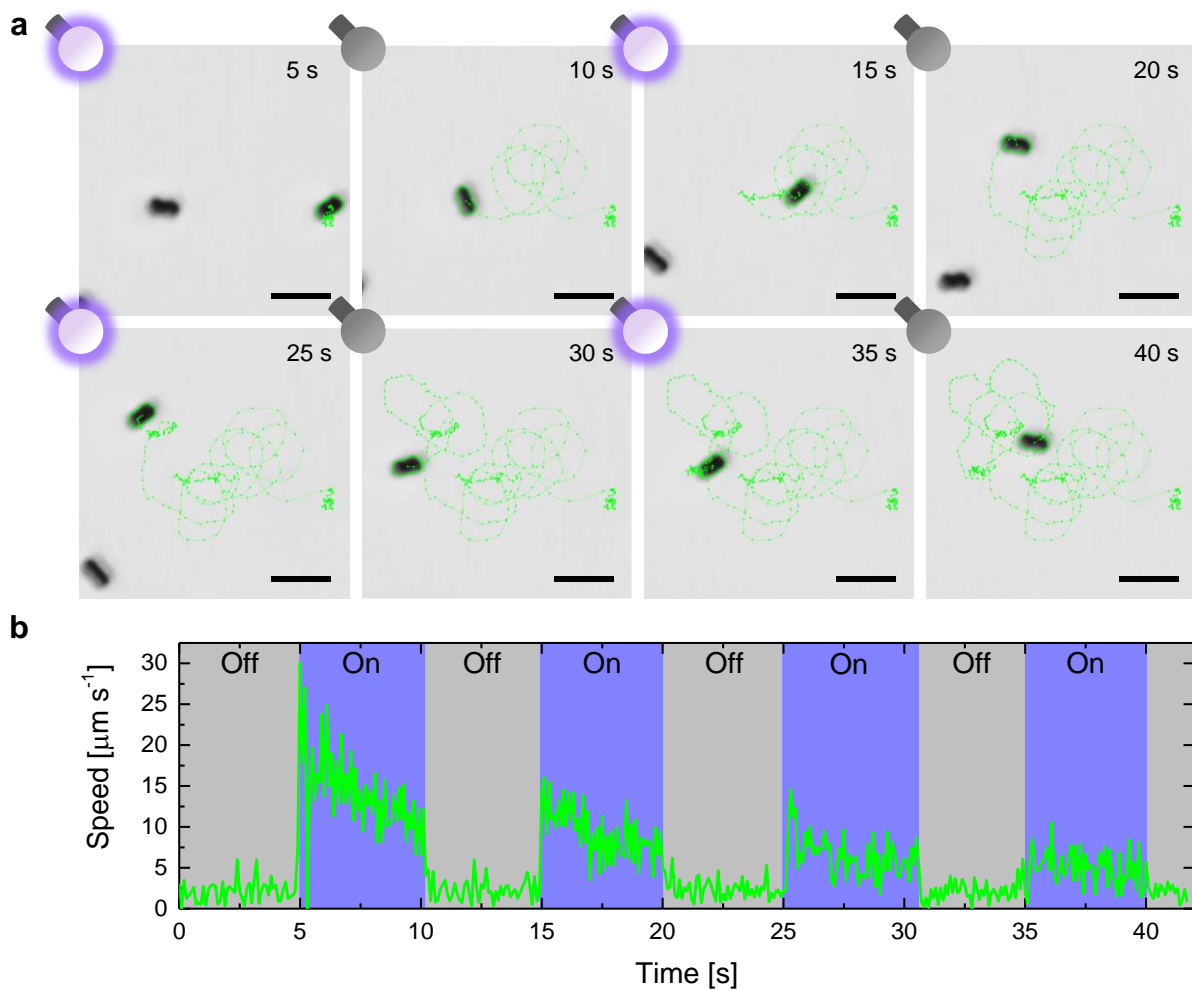

**Supplementary Fig. 4: Influence of the on/off switching of light on the motion behavior of  $\text{TiO}_2/\alpha\text{-Fe}_2\text{O}_3$  microrobots.** **a** Time-lapse micrographs showing the trajectory of a  $\text{TiO}_2/\alpha\text{-Fe}_2\text{O}_3$  microrobot at 5 s on/off switching of UV light irradiation in pure water and **b** the corresponding instantaneous speed as a function of time. Scale bars are 5  $\mu\text{m}$ .

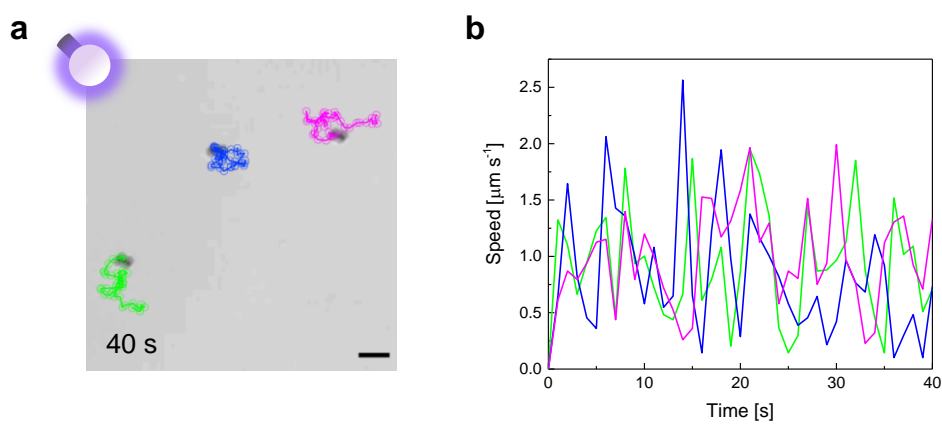

**Supplementary Fig. 5: Motion behavior of  $\alpha\text{-Fe}_2\text{O}_3$  microparticles.** **a** Micrograph showing the trajectories of three  $\alpha\text{-Fe}_2\text{O}_3$  microparticles under UV light irradiation in pure water for 40 s and **b** the corresponding instantaneous speed as a function of time. The scale bar is 5  $\mu\text{m}$ .

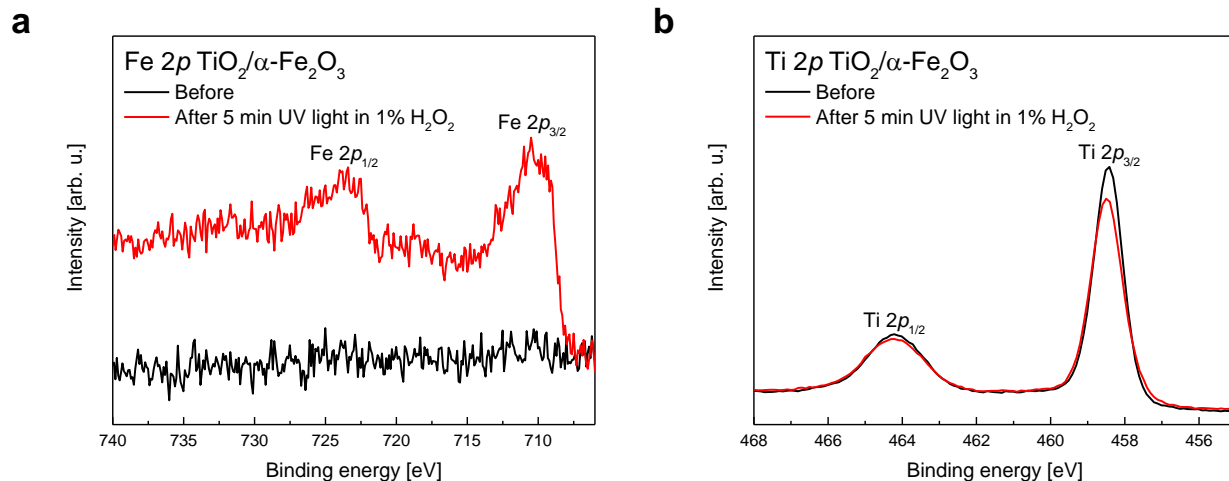

**Supplementary Fig. 6: Evidence of the partial corrosion of the TiO<sub>2</sub> layer of TiO<sub>2</sub>/α-Fe<sub>2</sub>O<sub>3</sub> microrobots by XPS analysis.** High-resolution XPS spectra of **a** Fe 2p and **b** Ti 2p for TiO<sub>2</sub>/α-Fe<sub>2</sub>O<sub>3</sub> microrobots before and after exposure to UV light irradiation in 1% H<sub>2</sub>O<sub>2</sub> for 5 min.

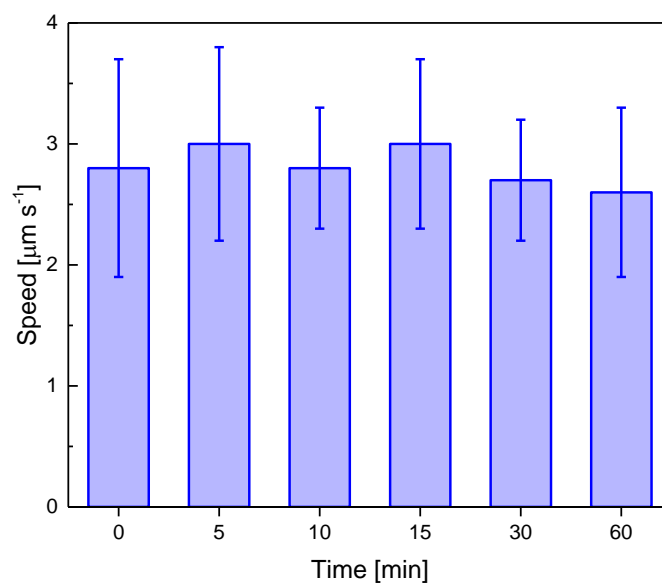

**Supplementary Fig. 7: Lifetime of the speed of TiO<sub>2</sub>/α-Fe<sub>2</sub>O<sub>3</sub> microrobots.** Speed of TiO<sub>2</sub>/α-Fe<sub>2</sub>O<sub>3</sub> microrobots under UV light irradiation in pure water as a function of time. Error bars represent the standard deviation,  $n = 20$  independent microrobots.

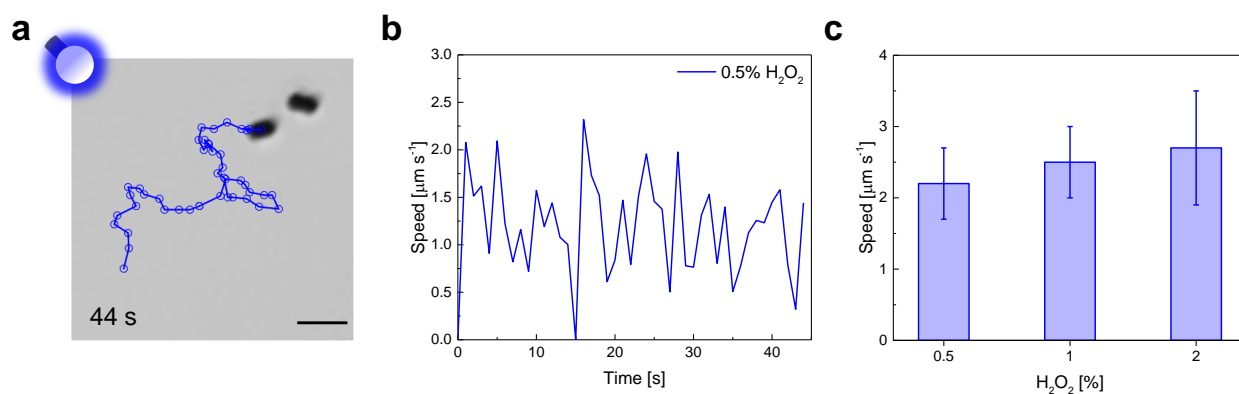

**Supplementary Fig. 8: Motion behavior of  $\text{TiO}_2/\alpha\text{-Fe}_2\text{O}_3$  microrobots under visible light irradiation.** **a** Micrograph showing the trajectory of a  $\text{TiO}_2/\alpha\text{-Fe}_2\text{O}_3$  microrobot under blue light irradiation in 0.5%  $\text{H}_2\text{O}_2$  for 44 s and **b** the corresponding instantaneous speed as a function of time. The scale bar is 5  $\mu\text{m}$ . **c** Microrobots' speed as a function of  $\text{H}_2\text{O}_2$  concentration under blue light irradiation. Error bars represent the standard deviation,  $n = 20$  independent microrobots.

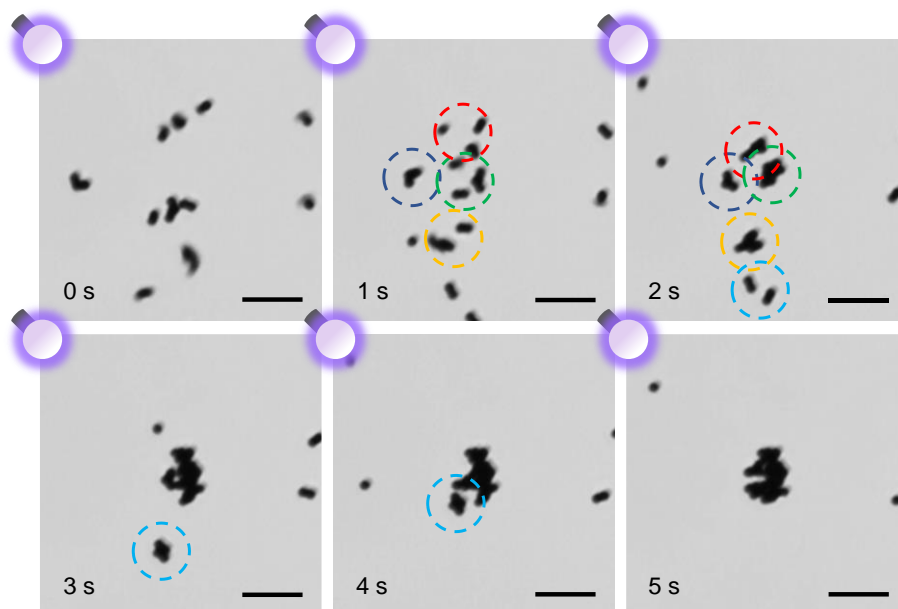

**Supplementary Fig. 9: Self-assembly of  $\text{TiO}_2/\alpha\text{-Fe}_2\text{O}_3$  microrobots into a cluster.** Time-lapse micrographs showing the clustering process of  $\text{TiO}_2/\alpha\text{-Fe}_2\text{O}_3$  microrobots under UV light irradiation in 1%  $\text{H}_2\text{O}_2$  for 5 s. Scale bars are 10  $\mu\text{m}$ .

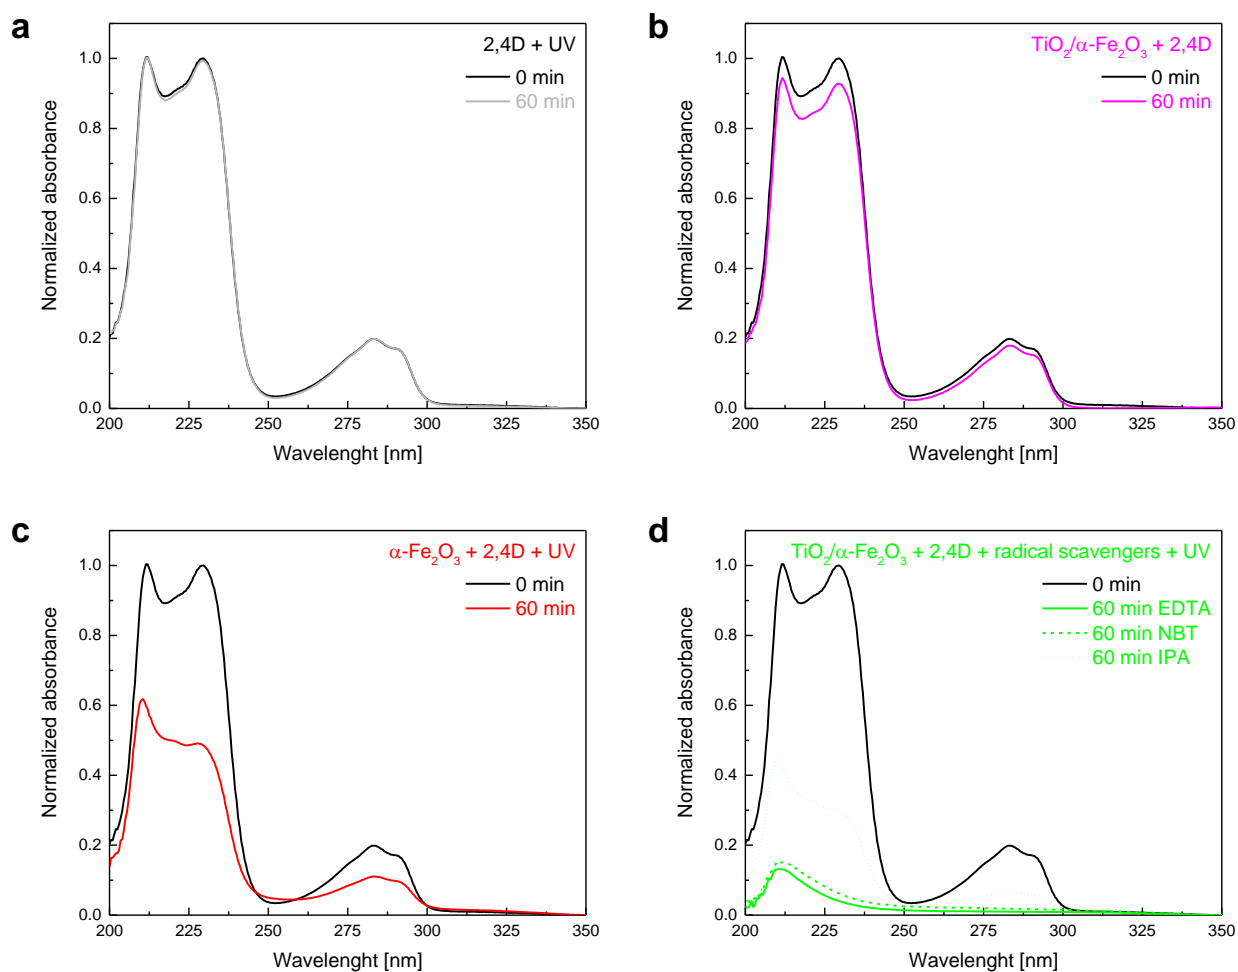

**Supplementary Fig. 10: Absorbance spectra of 2,4D solutions subjected to different treatments.** Absorbance spectra of 2,4D solutions ( $5 \times 10^{-5}$  M) before (0 min) and after the treatment with **a** UV light irradiation in pure water for 60 min, **b**  $\text{TiO}_2/\alpha\text{-Fe}_2\text{O}_3$  microrobots ( $1 \text{ mg mL}^{-1}$ ) without UV light irradiation in pure water for 60 min (“no motion” condition), **c**  $\alpha\text{-Fe}_2\text{O}_3$  microparticles ( $1 \text{ mg mL}^{-1}$ ) and UV light irradiation in pure water for 60 min, **d**  $\text{TiO}_2/\alpha\text{-Fe}_2\text{O}_3$  microrobots ( $1 \text{ mg mL}^{-1}$ ), a radical scavenger ( $10 \text{ mg L}^{-1}$  EDTA,  $10 \text{ mg L}^{-1}$  NBT, or  $0.25 \mu\text{L mL}^{-1}$  isopropanol), and UV light irradiation in pure water for 60 min.



## Supplementary Discussion 1

H<sub>2</sub>O<sub>2</sub> consumption experiments were performed to measure the H<sub>2</sub>O<sub>2</sub> consumption rate by TiO<sub>2</sub>/α-Fe<sub>2</sub>O<sub>3</sub> microrobots under UV light irradiation. For this purpose, UV-transparent cuvettes were filled with 1 mL of solution containing microrobots (1 mg mL<sup>-1</sup>) and 1% H<sub>2</sub>O<sub>2</sub>, and exposed to UV light irradiation for different durations (0, 10, 30, and 60 min). Afterward, microrobots were separated by centrifugation to record the UV-Vis absorbance spectra of treated solutions. The H<sub>2</sub>O<sub>2</sub> concentration was determined from absorbance spectra according to a previous work.<sup>4</sup> Supplementary Fig. 11 shows the time dependence of the H<sub>2</sub>O<sub>2</sub> concentration. The slope of the linear fit in the range 0÷30 min gave an H<sub>2</sub>O<sub>2</sub> consumption rate of 0.011 mol L<sup>-1</sup> min<sup>-1</sup>, corresponding to 1.8×10<sup>-7</sup> mol s<sup>-1</sup> for 1 mL of solution. To normalize the rate per unit area [mol s<sup>-1</sup> m<sup>-2</sup>], TiO<sub>2</sub>/α-Fe<sub>2</sub>O<sub>3</sub> microrobots' surface area was estimated. For simplicity, the microrobots were assumed to be peanut-shaped α-Fe<sub>2</sub>O<sub>3</sub> microparticles consisting of two adjacent spheres with a radius of 0.56 μm, as measured by STEM analysis. Considering that the volume (*V*) of a spherical particle with radius *r* is  $V = \frac{4}{3} \pi r^3$ , the volume occupied by a microrobot was found as ~1.5×10<sup>-18</sup> m<sup>3</sup>. Given an α-Fe<sub>2</sub>O<sub>3</sub> density (*ρ*) of 5.3 g cm<sup>-3</sup>, the mass (*m*) of the single microrobot was calculated to be 8.0×10<sup>-12</sup> g through the relation  $m = \rho V$ . Therefore, in 1 mL of solution with a concentration of microrobots of 1 mg mL<sup>-1</sup>, there are 1.3×10<sup>8</sup> microrobots. Since the surface (*A*) of a spherical particle with radius *r* is  $A = 4 \pi r^2$ , the area exposed by a microrobot was calculated to be 7.9×10<sup>-12</sup> m<sup>2</sup>, whereas the surface area of 1 mg of microrobots was found as 1.0×10<sup>-3</sup> m<sup>2</sup>. Consequently, the surface area-normalized H<sub>2</sub>O<sub>2</sub> consumption rate was calculated to be approximately 1.8×10<sup>-4</sup> mol s<sup>-1</sup> m<sup>-2</sup>.

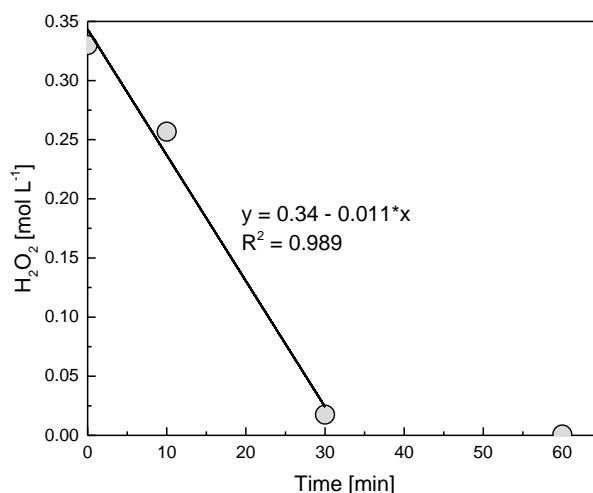

**Supplementary Fig. 11: H<sub>2</sub>O<sub>2</sub> consumption experiments.** H<sub>2</sub>O<sub>2</sub> concentration as a function of time following H<sub>2</sub>O<sub>2</sub> consumption experiments by TiO<sub>2</sub>/α-Fe<sub>2</sub>O<sub>3</sub> microrobots under UV light irradiation in 1% H<sub>2</sub>O<sub>2</sub>.

## Supplementary References

1. Urso, M., Ussia, M., Novotný, F. & Pumera, M. Trapping and detecting nanoplastics by MXene-derived oxide microrobots. *Nat. Commun.* **13**, 3573 (2022).
2. Biesinger, M. C. *et al.* Resolving surface chemical states in XPS analysis of first row transition metals, oxides and hydroxides: Cr, Mn, Fe, Co and Ni. *Appl. Surf. Sci.* **257**, 2717–2730 (2011).
3. Biesinger, M. C., Lau, L. W. M., Gerson, A. R. & Smart, R. S. C. Resolving surface chemical states in XPS analysis of first row transition metals, oxides and hydroxides: Sc, Ti, V, Cu and Zn. *Appl. Surf. Sci.* **257**, 887–898 (2010).
4. Aye, T. T., Low, T. Y. & Sze, S. K. Nanosecond laser-induced photochemical oxidation method for protein surface mapping with mass spectrometry. *Anal. Chem.* **77**, 5814–5822 (2005).
